# Supplementary material
Source: PubMed Central journal article supplement (PMC7091848)
Supplement: 41467_2014_BFncomms4594_MOESM1127_ESM.pdf [file 41467_2014_BFncomms4594_MOESM1127_ESM.pdf]

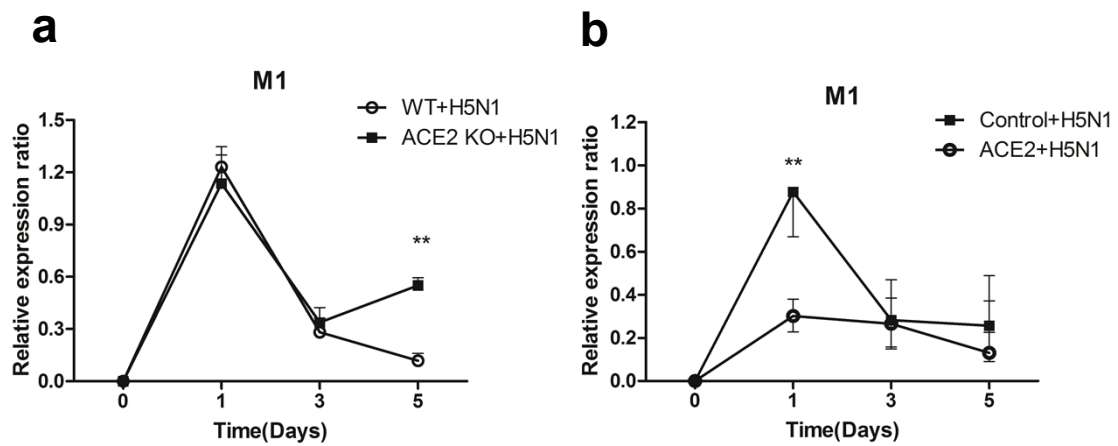

**Supplementary Figure 1. Virus replication changes in ACE2 KO and recombinant hACE2-treated mice after H5N1 virus infection.** (a) WT and ACE2 KO mice, (b) vehicle (BSA) or recombinant hACE2-treated mice were intratracheally instilled with H5N1 virus ( $10^6$  TCID<sub>50</sub>). The relative mRNA levels of H5N1 influenza A matrix 1(M1) expression were determined in the lungs of mice at the indicated time points using Real-Time PCR. Data are shown as mean  $\pm$  s.e.m., n=3-5 mice per time point. \*\*  $p < 0.01$  (two-tailed t-test). Each experiment was repeated at least twice.

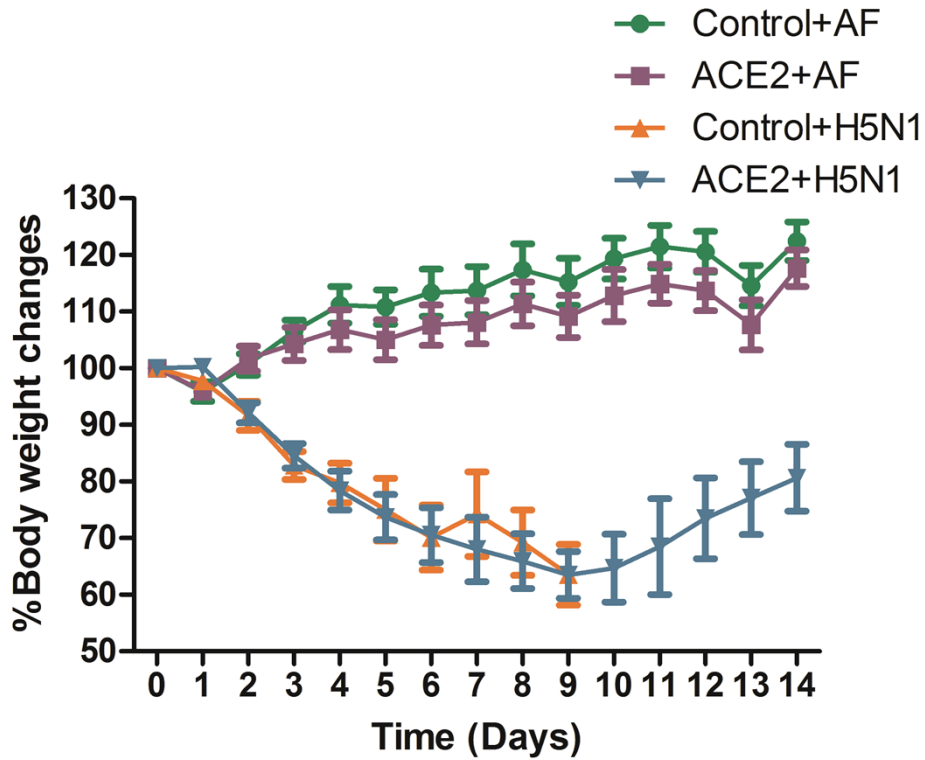

**Supplementary Figure 2. Body weight changes in recombinant hACE2 protein-treated mice after H5N1 virus infection.** Mice were treated with BSA+AF (control + AF, n = 5), recombinant hACE2 plus AF (n = 5), BSA plus H5N1 (n=21), and rhACE2 plus H5N1 (n=21). Mice were infected intratracheally with H5N1 ( $10^6$  TCID<sub>50</sub>). Body weights were recorded for a 14 day period after H5N1 infection. Data are shown as mean  $\pm$  s.e.m. The experiment was repeated three times.

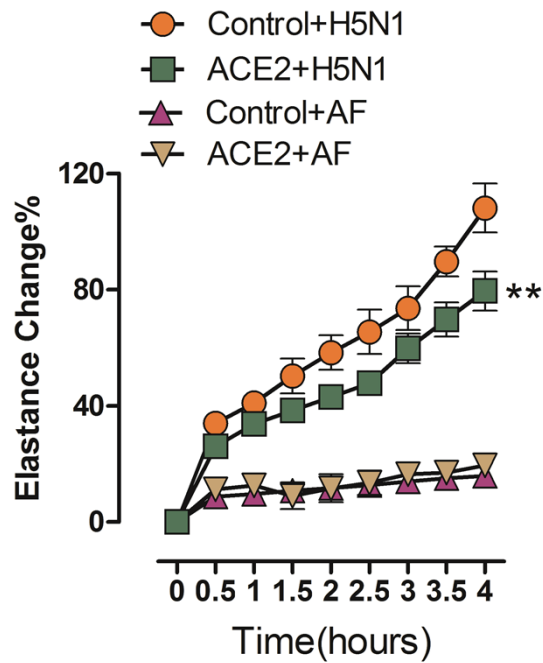

**Supplementary Figure 3. Lung elastance changes in recombinant hACE2-treated mice after the intratracheal instillation of inactivated H5N1 virus.** Percent change in lung elastance following the intratracheal instillation of vehicle control or inactivated H5N1 virus (10  $\mu\text{g/g}$ ). The mice were treated with recombinant hACE2 protein (i.p.:0.1 mg/kg) or a vehicle (PBS). Data are shown as mean  $\pm$  s.e.m. n = 4-6 mice per group. \*\*  $p < 0.01$  (ANOVA with Bonferroni post-t-tests). Experiment was repeated twice.

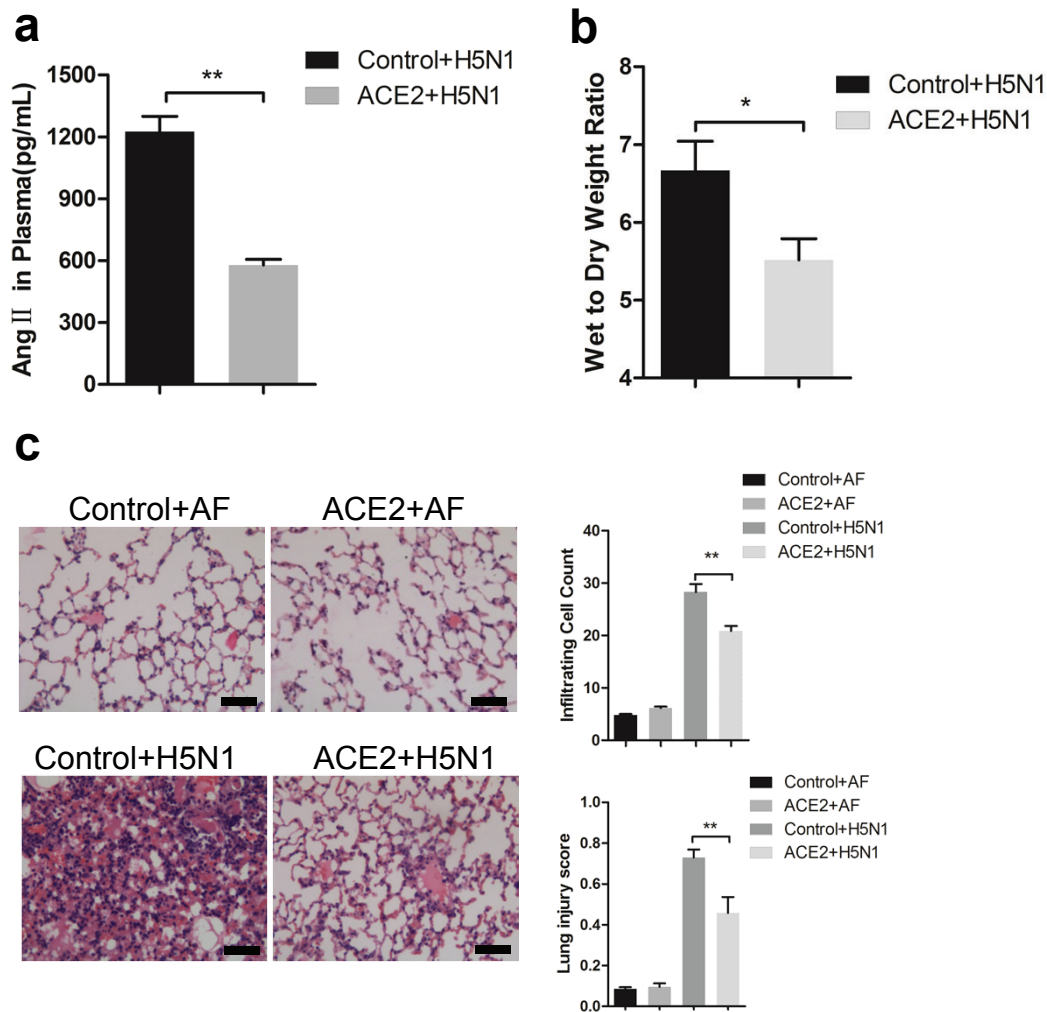

**Supplementary Figure 4. Recombinant hACE2 protein shows protection effect in a different administration strategy.** BALB/c mice were treated with vehicle (BSA) or recombinant hACE2 protein 1 hr, 1 day and 2 days after the instillation of AF or H5N1virus ( $10^6$  TCID<sub>50</sub>). **(a)** Angiotensin II levels in the serum of mice were determined using radioimmunoassays after 4 days. Data are shown as mean  $\pm$  s.e.m.  $n = 3-4$  mice per time point. \*\*  $p < 0.01$  (two-tailed t-test). **(b)** Wet/dry lung weight ratios were assessed after 4 days, Data are shown as mean  $\pm$  s.e.m.  $n = 4-5$  mice per group. \* $p < 0.05$  (two-tailed t-test). **(c)** Representative lung histopathology of mice. Scale bar = 100  $\mu$ m. The numbers of infiltrating cells per microscopic field (mean  $\pm$  SEM; top panel) and lung injury scores (mean  $\pm$  SEM; bottom panel) are shown for day 4 after infection in the bar graphs.  $n = 100$  fields analyzed for three mice for each treatment.\*\*  $p < 0.01$  (two-tailed t-test). Each experiment was repeated three times.

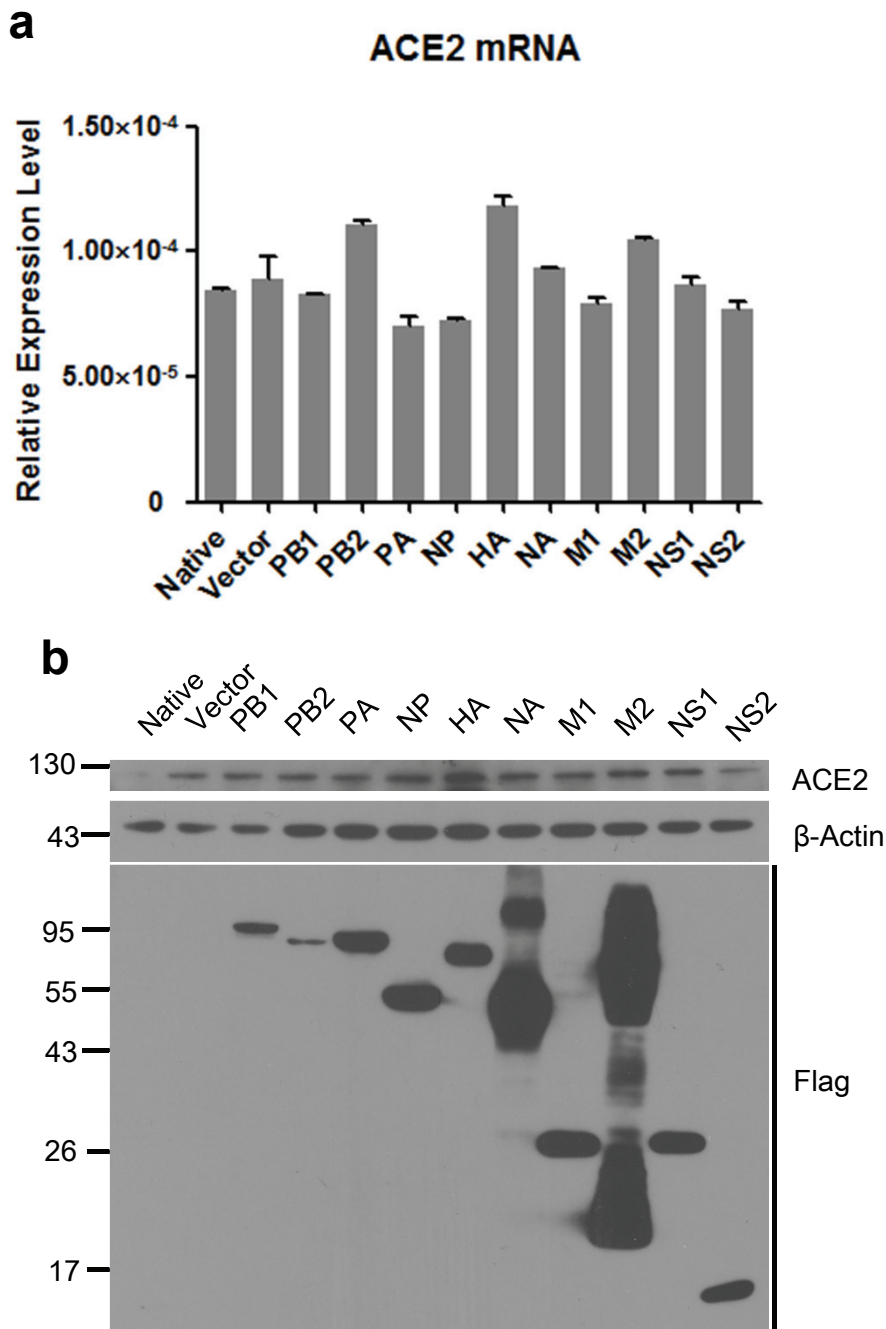

**Supplementary Figure 5. ACE2 expression levels in 293T cells expressing different H5N1 proteins.** Ten indicated H5N1 protein-coding plasmids were transfected into 293T cell line. **(a)** Relative ACE2 mRNA (Data are shown as mean  $\pm$  s.e.m.) and **(b)** protein expression level determined after 48 hrs. GAPDH mRNA and  $\beta$ -Actin expression are set as control individually. The experiment was repeated four times.

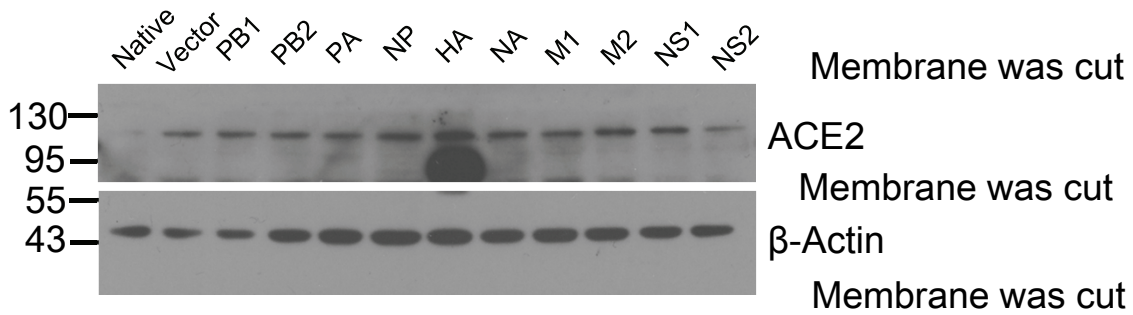

**Supplementary Figure 6 . Scans of Western blot shown in Supplementary Fig 5b.** ACE2 expression in 293T cell 48 hours after transfection with indicated H5N1 protein-coding plasmids.  $\beta$ -actin expression is shown as a loading control.

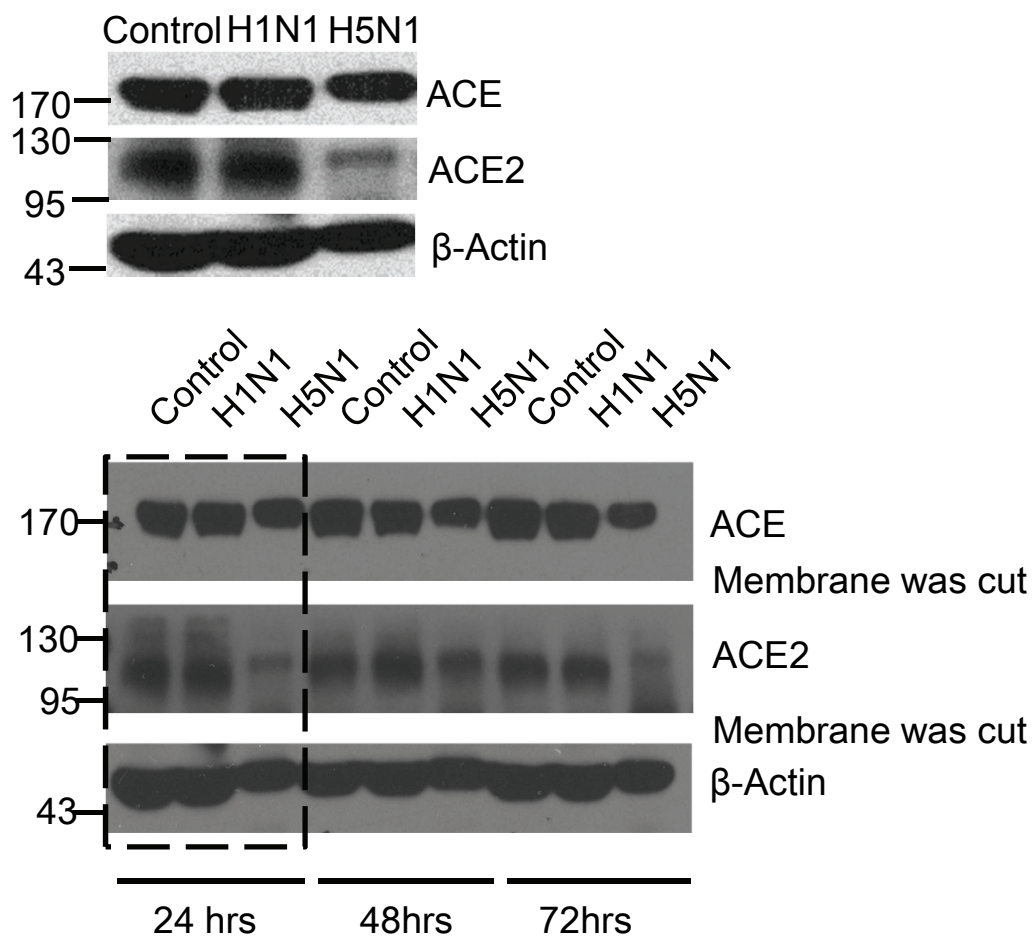

**Supplementary Figure 7. Scans of Western blot shown in Figure 2a.** ACE2 expression in lung tissue of mice infected with live H5N1 virus, live H1N1, or treated with allantoic fluid (AF) as a control.  $\beta$ -actin expression is shown as a loading control.
